# Supplementary material for: Conversion between the Modified Mini‐Mental State Examination (3MSE) and the Mini‐Mental State Examination (MMSE)
Source: PubMed Central journal article supplement — Alzheimers Dement (Amst). 2021 Mar 31;13(1):e12161. doi: 10.1002/dad2.12161 (PMC8010479; doi:10.1002/dad2.12161), 2021-03-31
Supplement: DAD2-13-e12161-s001.pdf [file DAD2-13-e12161-s001.pdf]

## Instructions to run SAS programs

Steps 1 -5 are for testing the program

Steps 6-8 are for running the program for your data set

### To test the programs

1. Go to link: <https://www.phs.wakehealth.edu/public/downloads.cfm#apps>
2. Download the two SAS programs and one test data set and store all the following 3 files (2 SAS program files - Macro.3MSE.Scoring.sas, Test\_3MSE\_scoring\_Supp.sas, and a SAS data file - test3mse\_finalsample) under the same directory (called LOCATION for example).
3. Open the file test.3MSE.Scoring.sas and put in LOCATION for paths in libname and % include.
4. Run the program, which will automatically run PROC CONTENTS for the output file.
5. The output data set is labeled TEST3MSE. Within the file the two columns (variables) named \_3MSE and MMSEs\_derived respectively contain the 3MSE and the MMSE score. \*

### To apply the program to your own data file

6. Follow variable names that accompany the 3MS form in this file.
7. Example: The variable q1p1 is for the first question part a. (see below)

1. When were you born?  
Enter "-7" in each field that a participant does not answer

month q1pa  day q1pb  year q1pc  \*TSCR DOB: 11/01/1930

place of birth:

1.1 city or town q1p1  
- Select -  
- Select -

1.2 state or county q1p2  
- Select -  
- Select -

|    | MaskID | d_visit | q1pa | q1pb | q1pc | q1p1 | q1p2 |
|----|--------|---------|------|------|------|------|------|
| 1  | 1      | 18737   | 1    | 1    | 1    | 1    | 1    |
| 2  | 834    | 18736   | 1    | 1    | 1    | 1    | 1    |
| 3  | 1692   | 18444   | 1    | 1    | 1    | 1    | 1    |
| 4  | 1848   | 18746   | 1    | 1    | 1    | 1    | 1    |
| 5  | 3424   | 18658   | 1    | 1    | 1    | 1    | 1    |
| 6  | 3680   | 18884   | 1    | 1    | 1    | 1    | 1    |
| 7  | 3751   | 18435   | 1    | 1    | 1    | 1    | 1    |
| 8  | 4157   | 18738   | 1    | 1    | 1    | 1    | 1    |
| 9  | 4294   | 18871   | 1    | 1    | 1    | 1    | 1    |
| 10 | 4804   | 18912   | 1    | 1    | 1    | 1    | 1    |

\*Note: Need 80% of non-missing responses to generate MMSE score

8. Edit the file Macro.3MSE.Scoring.sas so it has the proper path for where your data set is stored and run the program in Macro.3MSE.Scoring.sas.

Participant ID pid

Acrostic acrostic

Interviewer compby  V.C. vc

Date vis\_mth  / vis\_day  / vis\_yr

# Modified Mini Mental State Exam

CRF 2.2

1. When were you born?

Enter "-7" in each field that a participant does not answer

month q1pa  day q1pb  year q1pc  \*TSCR DOB: 11/01/1930

place of birth:

1.1 city or town q1p1

- 9 - Select -
- 1 answer given
- 0 error / refused
- 9 not attempted / disabled
- 6 Permanently missing

1.2 state or county q1p2

- 9 - Select -
- 1 answer given
- 0 error / refused
- 9 not attempted / disabled
- 6 Permanently missing

2. I am going to say three words for you to remember. Repeat them after I have said all three words: shirt, brown, honesty.

a. shirt

q2a

- 9 - Select -
- 1 answer given
- 0 error / refused
- 9 not attempted / disabled
- 6 Permanently missing

b. brown

q2b

- 9 - Select -
- 1 answer given
- 0 error / refused
- 9 not attempted / disabled
- 6 Permanently missing

c. honesty

q2c

- 9 - Select -
- 1 answer given
- 0 error / refused
- 9 not attempted / disabled
- 6 Permanently missing

d. Number of presentations necessary for the participant to repeat the sequence (1-7) q2d

3. I would like you to count from 1 to 5

3.1 q3p1

- 9 - Select -
- 1 able to count forward
- 2 unable to count forward
- 6 Permanently missing

- Select -

3.2 Now I would like you to count backwards from 5 to 1

Enter "-7" in each field that a participant does not answer

q3p2a  q3p2b  q3p2c  q3p2d  q3p2e  Record responses in the order given

4. Spell world

4.1 q4p1

- 9 - Select -
- 1 able to spell
- 2 unable to spell
- 6 Permanently missing

- Select -

4.2 Now spell world backwards.

Enter "-7" in each field that a participant does not answer

q4p2a  q4p2b  q4p2c  q4p2d  q4p2e  Record responses in the order given

q4check value="1"  Participant gave more than 5 letters

5. What three words did I ask you to remember earlier?

5.1 shirt q5p1

- 9 - Select -
- 3 spontaneous recall
- 2 correct word/incorrect form
- 2 after prompt "Something to wear."
- 1 after prompt "Was it shirt, shoes, or socks?"
- 0 unable to recall/refused
- 9 not attempted/disabled
- 6 Permanently missing

- Select -

5.2 brown q5p2

- 9 - Select -
- 3 spontaneous recall
- 2 correct word/incorrect form
- 2 after prompt "A color".
- 1 after prompt "Was it blue, black, or brown?"
- 0 unable to recall/refused
- 9 not attempted/disabled
- 6 Permanently missing

- Select -

5.3 honesty q5p3

- 9 - Select -
- 3 spontaneous recall

- 2 correct word/incorrect form
- 2 after prompt "A good, personal quality".
- 1 after prompt "Was it honesty, charity, modesty"
- 0 unable to recall/refused
- 9 not attempted/disabled
- 6 Permanently missing

- Select -

6.1 What is today's date?

Enter "-7" in each field that a participant does not answer

month q6p1a  day q6p1b  year q6p1c

6.2 "What is the day of the week?"

q6p2

- 9 - Select -
- 1 correct
- 0 error/refused
- 9 not attempted/disabled
- 6 Permanently missing

- Select -

6.3 "What season of the year is it?"

q6p3

- 9 - Select -
- 1 correct
- 0 error/refused
- 9 not attempted/disabled
- 6 Permanently missing

- Select -

7.1 "What state are we in?"

q7p1

- 9 - Select -
- 1 correct
- 0 error/refused
- 9 not attempted/disabled
- 6 Permanently missing

- Select -

7.2 "What county are we in?"

q7p2

- 9 - Select -
- 1 correct
- 0 error/refused
- 9 not attempted/disabled
- 6 Permanently missing

- Select -

7.3 "What (city/town) are we in?"

q7p3

- 9 - Select -
- 1 correct
- 0 error/refused
- 9 not attempted/disabled
- 6 Permanently missing

- Select -

7.4 "Are we in a clinic, store, or home?"

q7p4

- 9 - Select -

1 correct  
0 error/refused  
9 not attempted/disabled  
-6 Permanently missing

- Select -

8.1 pencil: "What is this?"

q8p1

-9 - Select -  
1 correct  
0 error/refused  
9 not attempted/disabled  
-6 Permanently missing

- Select -

8.2 watch: "What is this?"

q8p2

-9 - Select -  
1 correct  
0 error/refused  
9 not attempted/disabled  
-6 Permanently missing

- Select -

8.3 forehead: "What do you call this part of the face?"

q8p3

-9 - Select -  
1 correct  
0 error/refused  
9 not attempted/disabled  
-6 Permanently missing

- Select -

8.4 chin: "...And this part?"

q8p4

-9 - Select -  
1 correct  
0 error/refused  
9 not attempted/disabled  
-6 Permanently missing

- Select -

8.5 shoulder: "...And this part of the body?"

q8p5

-9 - Select -  
1 correct  
0 error/refused  
9 not attempted/disabled  
-6 Permanently missing

- Select -

8.6 elbow: "...And this part?"

q8p6

-9 - Select -  
1 correct  
0 error/refused  
9 not attempted/disabled  
-6 Permanently missing

- Select -

8.7 knuckle: "...And this part of the hand?"

q8p7

-9 - Select -  
1 correct  
0 error/refused  
9 not attempted/disabled  
-6 Permanently missing

- Select -

9. What animals have four legs? Tell me as many as you can.

Enter "-7" in each field that a participant does not answer

q9

10.1 In what way are an arm and a leg alike?

q10p1

- 9 - Select -
- 2 limbs, extremities
- 1 lesser correct answer
- 0 error/refused
- 9 not attempted/disabled
- 6 Permanently missing

- Select -

10.2 In what way are laughing and crying alike?

q10p2

- 9 - Select -
- 2 expressions of feelings, emotions
- 1 lesser correct answer
- 0 error/refused
- 9 not attempted/disabled
- 6 Permanently missing

- Select -

10.3 In what way are eating and sleeping alike?

q10p3

- 9 - Select -
- 2 necessary bodily functions, essential for life
- 1 lesser correct answer
- 0 error/refused
- 9 not attempted/disabled
- 6 Permanently missing

- Select -

11. Repeat what I say: I would like to go out.

q11

- 9 - Select -
- 2 correct
- 1 1 or 2 words missed
- 0 3 or more words missed/refused
- 9 not attempted / disabled
- 6 Permanently missing

- Select -

12. "Now repeat: No ifs, ands or buts."

12.1 no ifs q12p1

- 9 - Select -
- 1 correct
- 0 error/refused
- 9 not attempted/disabled
- 6 Permanently missing

- Select -

12.2 ands q12p2

- 9 - Select -
- 1 correct
- 0 error/refused
- 9 not attempted/disabled
- 6 Permanently missing

- Select -

12.3 or buts q12p3

-9 - Select -  
1 correct  
0 error/refused  
9 not attempted/disabled  
-6 Permanently missing

- Select -

13. Hold up Card 39-1 and say: "Please do this".

q13

-9 - Select -  
3 closes eyes without prompting  
2 closes eyes after prompting  
1 reads aloud, but does not close eyes  
0 does not read aloud or close eyes/refused  
9 not attempted/disabled  
-6 Permanently missing

- Select -

14. "Please write the following sentence: I would like to go out."

14.1 would q14p1

-9 - Select -  
1 correct  
0 error/refused  
9 not attempted/disabled  
-6 Permanently missing

- Select -

14.2 like q14p2

-9 - Select -  
1 correct  
0 error/refused  
9 not attempted/disabled  
-6 Permanently missing

- Select -

14.3 to q14p3

-9 - Select -  
1 correct  
0 error/refused  
9 not attempted/disabled  
-6 Permanently missing

- Select -

14.4 go q14p4

-9 - Select -  
1 correct  
0 error/refused  
9 not attempted/disabled  
-6 Permanently missing

- Select -

14.5 out q14p5

-9 - Select -  
1 correct  
0 error/refused  
9 not attempted/disabled  
-6 Permanently missing

- Select -

14.6 Note which hand the participant uses to write. If this is not done, ask participant if she is right or left-handed.



q14p6

- 9 - Select -
- 1 right
- 2 left
- 9 unknown
- 6 Permanently missing

- Select -

15 "Here is a drawing. Please copy the drawing onto this piece of paper."

15.1 pentagon 1 q15p1

- 9 - Select -
- 4 5 approximately equal sides
- 3 5 sides, but longest: shortest side is > 2:1
- 2 nonpentagon enclosed figure
- 1 2 or more lines, not an enclosure
- 0 less than 2 lines/refused
- 9 not attempted/disabled
- 6 Permanently missing

- Select -

15.2 pentagon 2 q15p2

- 9 - Select -
- 4 5 approximately equal sides
- 3 5 sides, but longest: shortest side is > 2:1
- 2 nonpentagon enclosed figure
- 1 2 or more lines, not an enclosure
- 0 less than 2 lines/refused
- 9 not attempted/disabled
- 6 Permanently missing

- Select -

15.3 intersection q15p3

- 9 - Select -
- 2 4-cornered enclosure
- 1 other than 4-cornered enclosure
- 0 no enclosure/refused
- 9 not attempted/disabled
- 6 Permanently missing

- Select -

16.1 takes paper in correct hand q16p1

- 9 - Select -
- 1 correct
- 0 error/refused
- 9 not attempted/disabled
- 6 Permanently missing

- Select -

16.2 folds paper in half

q16p2

- 9 - Select -
- 1 correct
- 0 error/refused
- 9 not attempted/disabled
- 6 Permanently missing

- Select -

16.3 hands paper back

q16p3

- 9 - Select -
- 1 correct
- 0 error/refused
- 9 not attempted/disabled
- 6 Permanently missing

- Select -

17. "What three words did I ask you to remember earlier?"

17.1 shirt

q17p1

- 9 - Select -
- 3 spontaneous recall
- 2 correct word/incorrect form
- 2 after prompt "Something to wear."
- 1 after prompt "Was it shirt, shoes, or socks?"
- 0 unable to recall/refused
- 9 not attempted/disabled
- 6 Permanently missing

- Select - 

17.2 brown

q17p2

- 9 - Select -
- 3 spontaneous recall
- 2 correct word/incorrect form
- 2 after prompt "A color."
- 1 after prompt "Was it blue, black, brown?"
- 0 unable to recall/refused
- 9 not attempted/disabled
- 6 Permanently missing

- Select - 

17.3 honesty

q17p3

- 9 - Select -
- 3 spontaneous recall
- 2 correct word/incorrect form
- 2 after prompt "A good personal quality"
- 1 after prompt "Was it honesty, charity, modesty?"
- 0 unable to recall/refused
- 9 not attempted/disabled
- 6 Permanently missing

- Select - 

18. Would you please tell me again where were you born?

18.1 city/town q18p1

- 9 - Select -
- 1 Matches
- 0 Doesn't Match
- 6 Permanently missing

- Select - 

18.2 state/country q18p2

- 9 - Select -
- 1 Matches
- 0 Doesn't Match
- 6 Permanently missing

- Select - 

19. Special problems?

q19

- 9 - Select -
- 1 1-Yes
- 0 0-No
- 6 Permanently missing

- Select - 

19.1 Primary problem:

q19p1

- 9 - Select -
- 1 Vision
- 2 Hearing
- 3 Inability to write due to injury/illness

- 4 Illiteracy/lack of education
- 5 Language (difficulty speaking/understanding English)
- 8 Other, specify
- 6 Permanently missing

- Select -

If other, specify: q19p1a

Secondary problem q19p1b

- 9 - Select -
- 1 yes
- 0 no
- 6 Permanently missing

- Select -

q19p1c

Total Score score\_f08\_3ms

Demographic form not filled out.

Telephone Screener not filled out.

Source Form Language: lang

- 9 -
- 1 English
- 2 Spanish

-

|                                         |                                                                                                                                                                                                                                                                                                                                                                                                                                                                                                                                                                                                                  |
|-----------------------------------------|------------------------------------------------------------------------------------------------------------------------------------------------------------------------------------------------------------------------------------------------------------------------------------------------------------------------------------------------------------------------------------------------------------------------------------------------------------------------------------------------------------------------------------------------------------------------------------------------------------------|
| Participant ID<br>(affix ID label here) | Acrostic <input type="text"/> <input type="text"/> <input type="text"/> <input type="text"/> <input type="text"/><br>Interviewer <input type="text"/> <input type="text"/> <input type="text"/> <input type="text"/> <input type="text"/> Visit Code <input type="text"/> <input type="text"/> <input type="text"/><br>Date of Visit <input type="text"/> <input type="text"/> <input type="text"/> <input type="text"/> <input type="text"/> <input type="text"/><br><div style="display: flex; justify-content: space-around; font-size: small;"> <span>Month</span> <span>Day</span> <span>Year</span> </div> |
|-----------------------------------------|------------------------------------------------------------------------------------------------------------------------------------------------------------------------------------------------------------------------------------------------------------------------------------------------------------------------------------------------------------------------------------------------------------------------------------------------------------------------------------------------------------------------------------------------------------------------------------------------------------------|

### Modified Mini-Mental State Exam (3MSE)

**“I would like to ask you a few questions that require concentration and memory. Some are a little bit more difficult than others. Some questions will be asked more than once.”**

1. **“When were you born?”** Record responses.

\_\_\_\_\_ / \_\_\_\_\_ / \_\_\_\_\_  
 M M D D Y Y Y Y

**“Where were you born?”** Record Responses.

|     | place of birth:        | answer given | can't do/refused | not att/disabled |
|-----|------------------------|--------------|------------------|------------------|
| 1.1 | city/town<br>_____     | 1            | 0                | 9                |
| 1.2 | state/country<br>_____ | 1            | 0                | 9                |

2. **“I am going to say three words for you to remember. Repeat them after I have said all three words: ‘shirt,’ ‘brown,’ ‘honesty.’”**

Do not repeat the words for the participant until after the first trial. The participant may give the words in any order. If there are errors on the first trial, repeat the items up to six times until they are learned.

| first trial only:                                                                            | answer given | can't do/refused | not att/disabled |
|----------------------------------------------------------------------------------------------|--------------|------------------|------------------|
| a. shirt                                                                                     | 1            | 0                | 9                |
| b. brown                                                                                     | 1            | 0                | 9                |
| c. honesty                                                                                   | 1            | 0                | 9                |
| d. number of presentations necessary for the participant to repeat the sequence (1-7): _____ |              |                  |                  |

3. **I would like you to count from 1 to 5.”**

- 3.1
- 1 able to count forward
  - 2 unable to count forward “Say “1-2-3-4-5”

3.2 **“Now I would like you to count backwards from 5 to 1.”**

Record responses in the order given:

4. **“Spell ‘world’.”**

- 1 able to spell
- 2 unable to spell “It’s spelled W-O-R-L-D”

4.1 **“Now spell ‘world’ backwards.”**

Record letters in the order given:

|                                         |                                                                                                                                       |
|-----------------------------------------|---------------------------------------------------------------------------------------------------------------------------------------|
| Participant ID<br>(affix ID label here) | Acrostic <input type="checkbox"/> <input type="checkbox"/> <input type="checkbox"/> <input type="checkbox"/> <input type="checkbox"/> |
|-----------------------------------------|---------------------------------------------------------------------------------------------------------------------------------------|

**5. "What three words did I ask you to remember earlier?"**

The words may be repeated in any order. If the participant cannot give the correct answer after a category cue, provide the three choices listed. If the participant still cannot give the correct answer from the three choices, mark 0 and provide the correct answer.

- 5.1** shirt                    **3** spontaneous recall  
                                   **2** correct word/incorrect form  
                                   **2** after "**Something to wear.**"  
                                   **1** after "**Was it shirt, shoes or socks?**"  
                                   **0** unable to recall/refused (provide the correct answer)  
                                   **9** not attempted/disabled

- 5.2** brown                    **3** spontaneous recall  
                                   **2** correct word/incorrect form  
                                   **2** after "**A color.**"  
                                   **1** after "**Was it blue, black, brown?**"  
                                   **0** unable to recall/refused (provide the correct answer)  
                                   **9** not attempted/disabled

- 5.3** honesty                    **3** spontaneous recall  
                                   **2** correct word/incorrect form  
                                   **2** after "**A good, personal quality.**"  
                                   **1** after "**Was it honesty, charity, modesty?**"  
                                   **0** unable to recall/refused (provide the correct answer)  
                                   **9** not attempted/disabled

**6.1 "What is today's date?"**      Probe for the month, day or year if not volunteered.

\_\_\_\_\_ / \_\_\_\_\_ / \_\_\_\_\_  
 M    M            D    D            Y    Y    Y    Y

**6.2 "What is the day of the week?"**

- |          |                        |                         |                           |
|----------|------------------------|-------------------------|---------------------------|
| <b>1</b> | correct                | Record answer in error. | Enter "X" if no response. |
| <b>0</b> | error/refused          |                         |                           |
| <b>9</b> | not attempted/disabled | _____                   |                           |
|          |                        | day of week             |                           |

**6.3 "What season of the year is it?"**

- |          |                        |                         |                           |
|----------|------------------------|-------------------------|---------------------------|
| <b>1</b> | correct                | Record answer in error. | Enter "X" if no response. |
| <b>0</b> | error/refused          |                         |                           |
| <b>9</b> | not attempted/disabled | _____                   |                           |
|          |                        | Season                  |                           |

|                                         |                                                                                                                                       |
|-----------------------------------------|---------------------------------------------------------------------------------------------------------------------------------------|
| Participant ID<br>(affix ID label here) | Acrostic <input type="checkbox"/> <input type="checkbox"/> <input type="checkbox"/> <input type="checkbox"/> <input type="checkbox"/> |
|-----------------------------------------|---------------------------------------------------------------------------------------------------------------------------------------|

**7.1 “What state are we in?”**

- 1 correct
- 0 error/refused
- 9 not attempted/disabled

Record answer in error.

Enter “X” if no response.

\_\_\_\_\_

State

**7.2 “What county (parish) are we in?”**

- 1 correct
- 0 error/refused
- 9 not attempted/disabled

Record answer in error.

Enter “X” if no response.

\_\_\_\_\_

County

**7.3 “What (city/town) are we in?”**

- 1 correct
- 0 error/refused
- 9 not attempted/disabled

Record answer in error.

Enter “X” if no response.

\_\_\_\_\_

City/town

**7.4 “Are we in a clinic, store, or home?”**

If the correct answer is not among the three alternatives, (e.g., hospital or nursing home), substitute it for the middle alternative (store). If the participant states that none is correct, ask them to make the best choice of the three options.

- 1 correct
- 0 error/refused
- 9 not attempted/disabled

**8.** Point to the object or a part of your own body and ask the participant to name it. Score 0 if the participant cannot name it within 2 seconds or gives an incorrect name. Do not wait for the participant to mentally search for the name.

|     |                                                     | correct | error/refused | not att/disabled |
|-----|-----------------------------------------------------|---------|---------------|------------------|
| 8.1 | pencil: “What is this?”                             | 1       | 0             | 9                |
| 8.2 | watch: “What is this?”                              | 1       | 0             | 9                |
| 8.3 | forehead: “What do you call this part of the face?” | 1       | 0             | 9                |
| 8.4 | chin: “...And this part?”                           | 1       | 0             | 9                |
| 8.5 | shoulder: “...And this part of the body?”           | 1       | 0             | 9                |
| 8.6 | elbow: “...And this part?”                          | 1       | 0             | 9                |
| 8.7 | knuckle: “And this part of the hand?”               | 1       | 0             | 9                |

|                                         |                                                                                                                                       |
|-----------------------------------------|---------------------------------------------------------------------------------------------------------------------------------------|
| Participant ID<br>(affix ID label here) | Acrostic <input type="checkbox"/> <input type="checkbox"/> <input type="checkbox"/> <input type="checkbox"/> <input type="checkbox"/> |
|-----------------------------------------|---------------------------------------------------------------------------------------------------------------------------------------|

**9. “What animals have four legs? Tell me as many as you can.”**

Discontinue after 30 seconds. Count all correct responses. If the participant gives no response in 10 seconds, and there are at least 10 seconds of remaining time, gently remind (once only) **“What (other) animals have four legs?”** The first time an incorrect answer is provided, say **“I want four-legged animals.”** Do not correct for subsequent errors.

Score (total correct responses):

|  |  |
|--|--|
|  |  |
|  |  |
|  |  |
|  |  |
|  |  |
|  |  |
|  |  |
|  |  |

(write any additional correct answers on a separate sheet of paper.)

**10.1 “In what way are an arm and a leg alike?”**

If the participant fails to give an answer that is worth 2 points, mark the appropriate score of 1 or 0. If the answer is not worth 2 points, coach the participant by saying “An arm and a leg are both limbs or extremities.” Do not coach for questions 10.2 and 10.3.

- 2** limbs, extremities
- 1** lesser correct answer (e.g., body parts, both bend, have joints)
- 0** error (e.g., states differences, gives unrelated answer)/refused
- 9** not attempted/disabled

**10.2 “In what way are laughing and crying alike?”**

- 2** expressions of feelings, emotions
- 1** lesser correct answer (e.g., sounds, expressions)
- 0** error (e.g., states differences, gives unrelated answer)/refused
- 9** not attempted/disabled

**10.3 “In what way are eating and sleeping alike?”**

- 2** necessary bodily functions, essential for life
- 1** lesser correct answer (e.g., bodily functions, relaxing, “good for you”)
- 0** error (e.g., states differences, gives unrelated answer)/refused
- 9** not attempted/disabled

**11. “Repeat what I say: I would like to go out.”**

Pronounce the individual words clearly, but with normal tempo of a spoken sentence.

- 2** Correct
- 1** 1 or 2 words missed
- 0** 3 or more words missed/refused
- 9** not attempted/disabled

|                                         |                                                                                                                                       |
|-----------------------------------------|---------------------------------------------------------------------------------------------------------------------------------------|
| Participant ID<br>(affix ID label here) | Acrostic <input type="checkbox"/> <input type="checkbox"/> <input type="checkbox"/> <input type="checkbox"/> <input type="checkbox"/> |
|-----------------------------------------|---------------------------------------------------------------------------------------------------------------------------------------|

**12. “Now repeat: No ifs, ands or buts.”**

Pronounce the Individual words clearly, but with normal tempo of a spoken sentence. Give no credit if the participant misses the “s”.

|             |                | <b>correct</b> | <b>error/refused</b> | <b>not att/disabled</b> |
|-------------|----------------|----------------|----------------------|-------------------------|
| <b>12.1</b> | <b>no ifs</b>  | 1              | 0                    | 9                       |
| <b>12.2</b> | <b>ands</b>    | 1              | 0                    | 9                       |
| <b>12.3</b> | <b>or buts</b> | 1              | 0                    | 9                       |

**13. Hold up Card 41-1 and say: “Please do this.”**

If the participant does not close his/her eyes within 5 seconds, prompt by pointing to the sentence and saying, “**Read and do what this says.**” If the participant has already read the sentence aloud spontaneously, simply say, “**Do what this says.**”

Allow 5 seconds for the response. Mark 1 if the participant reads the sentence aloud, either spontaneously or after your request, but does not close his/her eyes. As soon as the participant closes his/her eyes, say “**Open.**”

- 3** Closes eyes without prompting
- 2** Closes eyes after prompting
- 1** Reads aloud, but does not close eyes
- 0** Does not read aloud or close eyes/refused
- 9** Not attempted/disabled

**14. “Please write the following sentence: I would like to go out.”**

Hand the participant a piece of blank paper and a pencil with eraser. If necessary, repeat the sentence word by word as the participant writes. Allow a maximum of 1 minute after the first reading of the sentence for the scored response.

Either printing or cursive writing is allowed. Assign 1 point for each correct word, but no credit for “I”. For each word, mark 0 if there are spelling errors or incorrect mixed capitalizations (all letters printed in uppercase is permissible). Do not penalize self-corrected errors.

|             |              | <b>correct</b> | <b>error/refused</b> | <b>not att/disabled</b> |
|-------------|--------------|----------------|----------------------|-------------------------|
| <b>14.1</b> | <b>would</b> | 1              | 0                    | 9                       |
| <b>14.2</b> | <b>like</b>  | 1              | 0                    | 9                       |
| <b>14.3</b> | <b>to</b>    | 1              | 0                    | 9                       |
| <b>14.4</b> | <b>go</b>    | 1              | 0                    | 9                       |
| <b>14.5</b> | <b>out</b>   | 1              | 0                    | 9                       |

**14.6** Note which hand the participant uses to write. If this is not done, ask participant if he/she is right or left-handed. (For use in Question 16):

- 1** right
- 2** left
- 9** unknown



|                                         |                                                                                                                                       |
|-----------------------------------------|---------------------------------------------------------------------------------------------------------------------------------------|
| Participant ID<br>(affix ID label here) | Acrostic <input type="checkbox"/> <input type="checkbox"/> <input type="checkbox"/> <input type="checkbox"/> <input type="checkbox"/> |
|-----------------------------------------|---------------------------------------------------------------------------------------------------------------------------------------|

**15. “Here is a drawing. Please copy the drawing onto this piece of paper.”**

Hand the participant a piece of paper and Card 41-2. For right-handed participants, present the sample on their left side. For left-handed participants, present the sample on their right side. Allow one minute for copying. In scoring, do not penalize for self-corrected errors, tremors, minor gaps, or overshoots.

**15.1 pentagon 1**

- 4 5 approximately equal sides
- 3 5 sides, but longest: shortest side is > 2:1
- 2 nonpentagon enclosed figure
- 1 2 or more lines, not an enclosure
- 0 less than 2 lines/refused
- 9 not attempted/disabled

**15.2 pentagon 2**

- 4 5 approximately equal sides
- 3 5 sides, but longest: shortest side is > 2:1
- 2 nonpentagon enclosed figure
- 1 2 or more lines, not an enclosure
- 0 less than 2 lines/refused
- 9 not attempted/disabled

**15.3 intersection**

- 2 4-cornered enclosure
- 1 other than 4-cornered enclosure
- 0 no enclosure/refused
- 9 not attempted/disabled

|                                         |                                                                                                                                       |
|-----------------------------------------|---------------------------------------------------------------------------------------------------------------------------------------|
| Participant ID<br>(affix ID label here) | Acrostic <input type="checkbox"/> <input type="checkbox"/> <input type="checkbox"/> <input type="checkbox"/> <input type="checkbox"/> |
|-----------------------------------------|---------------------------------------------------------------------------------------------------------------------------------------|

**16.** Refer back to Question 14.6 to determine the participant’s dominant hand. Hold up a piece of white paper in plain view of the participant but out of his/her reach, and say:

**“Take this paper with your left (right for left-handed person) hand, fold it in half, and hand it back to me.”**

After saying the whole command, hold the paper within reach of the participant. Do not repeat any part of the command. Do not give visual cues for his/her to take or return the paper. He/She may hand it back with either hand.

|             |                             | correct | error/refused | not att/disabled |
|-------------|-----------------------------|---------|---------------|------------------|
| <b>16.1</b> | takes paper in correct hand | 1       | 0             | 9                |
| <b>16.2</b> | folds paper in half         | 1       | 0             | 9                |
| <b>16.3</b> | hands paper back            | 1       | 0             | 9                |

**17. “What three words did I ask you to remember earlier?”**

The words may be repeated in any order. Administer even if the score = 0 on question 5. If the participant cannot give the correct answer after a category cue, provide the three choices listed. If the participant still cannot give the correct answer from the three choices, mark “0” and provide the correct answer.

|             |         |   |                                                       |
|-------------|---------|---|-------------------------------------------------------|
| <b>17.1</b> | shirt   | 3 | spontaneous recall                                    |
|             |         | 2 | correct word/incorrect form                           |
|             |         | 2 | after <b>“Something to wear.”</b>                     |
|             |         | 1 | after <b>“Was it shirt, shoes or socks?”</b>          |
|             |         | 0 | unable to recall/refused (provide the correct answer) |
|             |         | 9 | not attempted/disabled                                |
| <b>17.2</b> | brown   | 3 | spontaneous recall                                    |
|             |         | 2 | correct word/incorrect form                           |
|             |         | 2 | after <b>“A color.”</b>                               |
|             |         | 1 | after <b>“Was it blue, black, brown?”</b>             |
|             |         | 0 | unable to recall/refused (provide the correct answer) |
|             |         | 9 | not attempted/disabled                                |
| <b>17.3</b> | honesty | 3 | spontaneous recall                                    |
|             |         | 2 | correct word/incorrect form                           |
|             |         | 2 | after <b>“A good, personal quality.”</b>              |
|             |         | 1 | after <b>“Was it honesty, charity, modesty?”</b>      |
|             |         | 0 | unable to recall/refused (provide the correct answer) |
|             |         | 9 | not attempted/disabled                                |

|                                         |                                                                                                                                       |
|-----------------------------------------|---------------------------------------------------------------------------------------------------------------------------------------|
| Participant ID<br>(affix ID label here) | Acrostic <input type="checkbox"/> <input type="checkbox"/> <input type="checkbox"/> <input type="checkbox"/> <input type="checkbox"/> |
|-----------------------------------------|---------------------------------------------------------------------------------------------------------------------------------------|

**18. “Would you please tell me again where were you born?” Record Responses.**

|                                                   | Matches Q1.1 & 1.2 | Doesn't Match/refused | not att/ disabled |
|---------------------------------------------------|--------------------|-----------------------|-------------------|
| <b>18.1</b> place of birth:<br>city/town<br>_____ | 1                  | 0                     | 9                 |
| <b>18.2</b> state/country<br>_____                | 1                  | 0                     | 9                 |

**19.** Special problems?  
 1    **yes** \_\_\_\_\_  
 0    **no**                     ↓

**19.1 Primary problem:**

- 1    **Vision**
- 2    **Hearing**
- 3    **Inability to write due to injury/illness**
- 4    **Illiteracy/lack of education**
- 5    **Language (difficulty speaking/ understanding English)**
- 8    **Other, specify:** \_\_\_\_\_

**Secondary problem:**

- 1    **Yes, specify:** \_\_\_\_\_
- 0    **no**

**Total 3MSE Score**
